# Supplementary material
Source: Atypon-hosted journal article supplement (doi:10.1287/mnsc.2024.08024)
Supplement: mnsc.2024.08024.sm1.pdf [file mnsc.2024.08024.sm1.pdf]

# Online Appendix A

## The Effects of Personal Data Management on Competition and Welfare

Jiajia Cong\*    Noriaki Matsushima†

This online appendix provides proofs for the formal results in the paper. The proofs for Propositions 1 and all Corollaries are omitted from this appendix, as they can be readily derived through basic calculations. The detailed analysis of the extensions in Sections 5.5 and 6 are included in the Online Appendix B, which also contains additional extensions.

### 1 Proof of Lemma 1

Let us consider a consumer of firm  $B_1$ . If she erases her data, she receives utility  $v_A - tx - \alpha_1^a - \varepsilon$  or utility  $v_A - t(1-x) - \alpha_2^a - \varepsilon$  in market  $A$ . Otherwise, she receives utility  $v_A - tx - p_1^a(x)$  or utility  $v_A - t(1-x) - \alpha_2^a$ . When her location  $x$  is smaller than  $\bar{x}_1 = 1/2 + \alpha_2^a/(2t)$ , firm  $A_1$  charges the optimal personalized price  $p_1^a(x) = \alpha_2^a + t(1-2x)$ , equalizing  $v_A - tx - p_1^a(x)$  and  $v_A - t(1-x) - \alpha_2^a$ , and wins over the consumer. Therefore, a consumer  $x \in [0, \bar{x}_1]$  does not erase her data if and only if  $v_A - tx - p_1^a(x) \geq \max\{v_A - tx - \alpha_1^a, v_A - t(1-x) - \alpha_2^a\} - \varepsilon$ , which is equivalent to  $x > \tilde{x}_1$ . When the consumer's location  $x > \bar{x}_1$ , she always purchases from firm  $A_2$  under price  $\alpha_2$ , irrespective of data erasure. She refrains from data erasure because erasing data does not generate any benefit but brings costs  $\varepsilon$ . In summary, a consumer of firm  $B_1$  chooses to erase data if and only if her location  $x$  in market  $A$  satisfies  $x < \tilde{x}_1$ . The data erasure strategy of firm  $B_2$ 's consumers can be derived using a similar approach.

---

\*College of Business, City University of Hong Kong, jiajia.cong@cityu.edu.hk.

†Osaka School of International Public Policy, University of Osaka, matsushima@osipp.osaka-u.ac.jp.

## 2 Proof of Proposition 2

We have  $\beta_i^n - \beta_i^* = (t - \varepsilon)(t + 15\varepsilon)/(16t) > 0$ . Consequently, it follows that  $\pi_{B_i}^n - \pi_{B_i}^* = (\beta_i^n - \beta_i^*)/2 > 0$ . In market  $A$ , we find that  $\pi_{A_i}^n - \pi_{A_i}^* = (t - \varepsilon)(3\varepsilon - t)/(32t) > 0$ . Thus, we conclude that  $\pi_{A_i}^n + \pi_{B_i}^n > \pi_{A_i}^* + \pi_{B_i}^*$ .

## 3 Proof of Proposition 3

Consumer surplus in market  $A$  under no data management and data management is  $CS_A^n = E[CS_{B_1}]/2 + E[CS_{B_2}]/2 = v_A - t$  and  $CS_A^* = E[CS_{B_1}]/2 + E[CS_{B_2}]/2 = v_A - \frac{5t^2 - \varepsilon^2}{4t}$ , respectively. Consumer surplus in market  $B$  under no data management and data management is

$$CS_B^n = \int_0^{1/2} (v_B - ky - \beta_1^n) dy + \int_{1/2}^1 (v_B - k(1-y) - \beta_2^n) dy = v_B - \frac{20k - 7t}{16},$$

$$CS_B^* = \int_0^{1/2} (v_B - ky - \beta_1^*) dy + \int_{1/2}^1 (v_B - k(1-y) - \beta_2^*) dy = v_B - \frac{20tk - 8t^2 - 14t\varepsilon + 15\varepsilon^2}{16t}.$$

With these expressions, verifying Proposition 3 is straightforward.

## 4 Proof of Proposition 4

■ **Collection opt-out** Firm  $A_1$ 's profit from the uniform price is  $\alpha_1[(1-r)(1-\delta_h)\bar{x}_2 + r\hat{x}]$ , where  $\bar{x}_2 = \frac{1}{2} - \frac{\alpha_1}{2t}$  and  $\hat{x} = \frac{1}{2} + \frac{\alpha_2 - \alpha_1}{2t}$ . Similarly, firm  $A_2$ 's profit from the uniform price is  $\alpha_2[(1-r)\delta_h(1-\bar{x}_1) + r(1-\hat{x})]$ . The equilibrium uniform prices are  $\alpha_1^\circ = \frac{t((\delta_h-1)r-\delta_h)(-2\delta_h+2\delta_h r+r+2)}{4(\delta_h-1)\delta_h+(1-2\delta_h)^2 r^2+(-8\delta_h^2+8\delta_h-4)r}$  and  $\alpha_2^\circ = \frac{t(2(\delta_h-1)\delta_h+\delta_h(2\delta_h-3)r^2+(-4\delta_h^2+5\delta_h-3)r)}{4(\delta_h-1)\delta_h+(1-2\delta_h)^2 r^2+(-8\delta_h^2+8\delta_h-4)r}$ , in which the superscript  $\circ$  indicates opting out of data collection. In the competition of market  $A$ , firms' optimal personalized prices  $p_1^\circ(x)$  and  $p_2^\circ(x)$  are determined in the same manner as in the baseline model. The profits of firm  $A_1$  and firm  $A_2$  are

$$\pi_{A_1} = \alpha_1^\circ[(1-r)(1-\delta_h)\bar{x}_2^\circ + r\hat{x}^\circ] + (1-r)\delta_h \int_0^{\bar{x}_1^\circ} p_1^\circ(x) dx,$$

$$\pi_{A_2} = \alpha_2^\circ[(1-r)\delta_h(1-\bar{x}_1^\circ) + r(1-\hat{x}^\circ)] + (1-r)(1-\delta_h) \int_{\bar{x}_2^\circ}^1 p_2^\circ(x) dx.$$

The expected utility of  $B_1$ 's opt-in consumers,  $B_2$ 's opt-in consumers, and opt-out consumers

are

$$\begin{aligned}
E[CS_{B_1}^h] &= \int_0^{\bar{x}_1^\circ} (v_A - p_1^\circ(x) - tx)dx + \int_{\bar{x}_1^\circ}^1 (v_A - \alpha_2^\circ - t(1-x))dx = \int_0^1 (v_A - \alpha_2^\circ - t(1-x))dx, \\
E[CS_{B_2}^h] &= \int_0^{\bar{x}_2^\circ} (v_A - \alpha_1^\circ - tx)dx + \int_{\bar{x}_2^\circ}^1 (v_A - p_2^\circ(x) - t(1-x))dx = \int_0^1 (v_A - \alpha_1^\circ - tx)dx, \\
E[CS_{B_1}^l] &= E[CS_{B_2}^l] = \int_0^{\hat{x}^\circ} (v_A - \alpha_1^\circ - tx)dx + \int_{\hat{x}^\circ}^1 (v_A - \alpha_2^\circ - t(1-x))dx.
\end{aligned}$$

The indifferent consumer  $\delta_l$  in market  $B$  is determined by  $v_B - \beta_1 - t\delta_l + E[CS_{B_1}^l] = v_B - \beta_2 - t(1 - \delta_l) + E[CS_{B_2}^l]$ , resulting in  $\delta_l = \frac{t+\beta_2-\beta_1}{2t}$ . This expression is the same as the Hotelling indifferent consumer. The indifferent consumer  $\delta_h$  in market  $B$  is determined by  $v_B - \beta_1 - t\delta_h + E[CS_{B_1}^h] = v_B - \beta_2 - t(1 - \delta_h) + E[CS_{B_2}^h]$ . Since  $E[CS_{B_1}^h] > E[CS_{B_2}^h]$  holds if and only if  $\delta_h > 1/2$ , firms' price competition in market  $B$  intensifies compared to the competition analyzed in Section 4.1.

The profit of firm  $B_1$  is  $\pi_{B_1} = \beta_1[r\delta_l + (1-r)\delta_h]$  and the profit of firm  $B_2$  is  $\pi_{B_2} = \beta_2[r(1 - \delta_l) + (1-r)(1 - \delta_h)]$ . Firm  $i$  chooses  $\beta_i$  to maximize its two-market profit  $\pi_{A_i} + \pi_{B_i}$ , resulting in equilibrium prices expressed as  $\beta_i^\circ = \frac{t(9+9r+15r^2+11r^3+4r^4)}{16(1+2r-r^2+r^3)}$  and  $\delta^\circ = 1/2$ . We observe that  $\beta^\circ$  exhibits a U-shaped pattern with respect to  $r \in [0, 1]$ , attaining its minimum value at  $r = 0.16$ . It is straightforward to verify that  $\beta_i^\circ < \beta_i^H$  consistently holds, where  $\beta_i^H = t$  represents the Hotelling price, and that  $\beta_i^\circ > \beta_i^n$  holds whenever  $r > 0.36$ . Additionally, we can confirm that  $\pi_{A_i}^\circ + \pi_{B_i}^\circ > \pi_{A_i}^n + \pi_{B_i}^n$  whenever  $r > 0.19$ ;  $CS_A^\circ < CS_A^n$  always holds;  $CS_B^\circ < CS_B^n$  whenever  $r > 0.36$ ; and  $CS_A^\circ + CS_B^\circ < CS_A^n + CS_B^n$  whenever  $r > 0.16$ .

■ **Full control** Firm  $A_1$ 's profit from the uniform price is  $\alpha_1[(1-r)(1-\delta_h)\bar{x}_2 + r\hat{x} + (1-r)\delta_h\tilde{x}_1]$ . Similarly, firm  $A_2$ 's profit from the uniform price is  $\alpha_2[(1-r)\delta_h(1-\bar{x}_1) + r(1-\hat{x}) + (1-r)(1-\delta_h)(1-\tilde{x}_2)]$ . The equilibrium uniform prices are  $\alpha_1^\circ = \frac{t(2\delta_h-2(\delta_h-1)r+1)-(r-1)\varepsilon((\delta_h-1)r-2\delta_h)}{r+2}$  and  $\alpha_2^\circ = \frac{(r-1)\varepsilon(\delta_h(r-2)+2)+t(2\delta_h(r-1)+3)}{r+2}$ . In the competition of market  $A$ , firms' optimal personalized prices  $p_1^\circ(x)$  and  $p_2^\circ(x)$  are determined in the same manner as in the baseline model. The profits of firm  $A_1$  and firm  $A_2$  are

$$\begin{aligned}
\pi_{A_1} &= \alpha_1^\circ[(1-r)(1-\delta_h)\bar{x}_2^\circ + r\hat{x}^\circ + (1-r)\delta_h\tilde{x}_1^\circ] + (1-r)\delta_h \int_{\bar{x}_1^\circ}^{\bar{x}_1^\circ} p_1^\circ(x)dx, \\
\pi_{A_2} &= \alpha_2^\circ[(1-r)\delta_h(1-\bar{x}_1^\circ) + r(1-\hat{x}^\circ) + (1-r)(1-\delta_h)(1-\tilde{x}_2^\circ)] + (1-r)(1-\delta_h) \int_{\bar{x}_2^\circ}^{\bar{x}_2^\circ} p_2^\circ(x)dx.
\end{aligned}$$

The expected utility of  $B_1$ 's opt-in consumers,  $B_2$ 's opt-in consumers, and opt-out consumers

are

$$\begin{aligned}
E[CS_{B_1}^h] &= \int_0^{\bar{x}_1^\circ} (v_A - \alpha_1^\circ - tx - \varepsilon)dx + \int_{\bar{x}_1^\circ}^{\bar{x}_1^\circ} (v_A - p_1^\circ(x) - tx)dx + \int_{\bar{x}_1^\circ}^1 (v_A - \alpha_2^\circ - t(1-x))dx, \\
E[CS_{B_2}^h] &= \int_0^{\bar{x}_2^\circ} (v_A - \alpha_1^\circ - tx)dx + \int_{\bar{x}_2^\circ}^{\bar{x}_2^\circ} (v_A - p_2^\circ(x) - t(1-x))dx + \int_{\bar{x}_2^\circ}^1 (v_A - \alpha_2^\circ - t(1-x) - \varepsilon)dx, \\
E[CS_{B_1}^l] &= E[CS_{B_2}^l] = \int_0^{\hat{x}^\circ} (v_A - \alpha_1^\circ - tx)dx + \int_{\hat{x}^\circ}^1 (v_A - \alpha_2^\circ - t(1-x))dx.
\end{aligned}$$

The indifferent consumer  $\delta_l$  in market  $B$  is determined by  $v_B - \beta_1 - t\delta_l + E[CS_{B_1}^l] = v_B - \beta_2 - t(1 - \delta_l) + E[CS_{B_2}^l]$ , resulting in  $\delta_l = \frac{t + \beta_2 - \beta_1}{2t}$ . This expression is same as the Hotelling indifferent consumer, which is less sensitive to firms' prices in market  $B$  compared to the indifferent consumer in Section 4.2. The indifferent consumer  $\delta_h$  in market  $B$  is determined by  $v_B - \beta_1 - t\delta_h + E[CS_{B_1}^h] = v_B - \beta_2 - t(1 - \delta_h) + E[CS_{B_2}^h]$ . Since  $E[CS_{B_1}^h] > E[CS_{B_2}^h]$  holds if and only if  $\delta_h > (2t(r-4) + \varepsilon(6-5r+2r^2))/(4(r-1)(2t+(r-2)\varepsilon))$ , firms compete more aggressively in market  $B$  to attract consumers.

The profit of firm  $B_1$  is  $\pi_{B_1} = \beta_1[r\delta_l + (1-r)\delta_h]$  and the profit of firm  $B_2$  is  $\pi_{B_2} = \beta_2[r(1-\delta_l) + (1-r)(1-\delta_h)]$ . Firm  $i$  chooses  $\beta_i$  to maximize its two-market profit  $\pi_{A_i} + \pi_{B_i}$ , resulting in the equilibrium prices as

$$\beta_i^\circ = \frac{t(4(r^2+7r+4)t^2 + 4(r^3+r^2+5r-7)t\varepsilon + (r^4-r^3+25r^2-55r+30)\varepsilon^2)}{16(r(r^2-3r+2)\varepsilon^2 + (r+2)t^2 + 2(r-1)rt\varepsilon)}$$

and  $\delta^\circ = 1/2$ . Given  $\varepsilon$ , we observe that  $\beta^\circ$  exhibits a U-shaped pattern with respect to  $r \in [0, 1]$ . It is straightforward to verify that  $\beta_i^\circ < \beta_i^H$  consistently holds, where  $\beta_i^H = t$  represents the Hotelling price, and that  $\beta_i^\circ > \beta_i^*$  holds whenever  $r > \hat{r}(t, \varepsilon)$ . Additionally, we can confirm that  $\pi_{A_i}^\circ + \pi_{B_i}^\circ > \pi_{A_i}^* + \pi_{B_i}^*$  whenever  $r > \hat{r}_\pi(t, \varepsilon)$ ;  $CS_A^\circ < CS_A^*$  always holds;  $CS_B^\circ < CS_B^*$  whenever  $r > \hat{r}_B(t, \varepsilon)$ ; and  $CS_A^\circ + CS_B^\circ < CS_A^* + CS_B^*$  whenever  $r > \hat{r}_{AB}(t, \varepsilon)$ .

## 5 Proof for Proposition 5

Firm  $A_i$ 's uniform price is used solely to poach the rival's targeted consumers, as in the benchmark of no data management in Section 4.1. Consequently, the equilibrium uniform prices in market  $A$  are  $\alpha_1^{**} = \alpha_2^{**} = t/2$ , implying  $\bar{x}_1^{**} = 3/4$  and  $\bar{x}_2^{**} = 1/4$ . It is straightforward to check that no firm has incentive to deviate from  $\alpha_1^{**}$  and  $\alpha_2^{**}$ . Two firms' equilibrium profits in market

$A$  are

$$\begin{aligned}\pi_{A_1}^{**} &= \alpha_1^{**}(1 - \delta)\bar{x}_2^{**} + \delta \int_0^{\frac{1}{2}} t(1 - 2x)dx + (1 - \delta) \int_{\bar{x}_2^{**}}^{\frac{1}{2}} t(1 - 2x)dx = \frac{t}{16}(3 + \delta), \\ \pi_{A_2}^{**} &= \alpha_2^{**}\delta(1 - \bar{x}_1^{**}) + \delta \int_{\frac{1}{2}}^{\bar{x}_1^{**}} t(2x - 1)dx + (1 - \delta) \int_{\frac{1}{2}}^1 t(2x - 1)dx = \frac{t}{16}(4 - \delta).\end{aligned}$$

Notice that  $E[CS_{B_1}] = E[CS_{B_2}]$  always holds, implying the indifferent consumer in market  $B$  is  $\delta = (t + \beta_2 - \beta_1)/(2t)$ . Firm  $B_i$  chooses  $\beta_i$  to maximize its two-market profit:  $\Pi_i = \pi_{A_i}^{**} + \pi_{B_i}$ . The equilibrium uniform prices are  $\beta_1^{**} = \beta_2^{**} = 15t/16$ , implying  $\delta^{**} = 1/2$ .

We consider two benchmarks for comparison. In benchmark one (with superscript  $n$ ), consumers cannot manage their data (Section 4.1). In the other benchmark (with superscript  $*$ ), consumers can only use data erasure for data management (Section 4.2). The ranking of firms' profits is:  $\pi_{A_i}^n > \pi_{A_i}^* > \pi_{A_i}^{**}$ ,  $\pi_{B_i}^{**} > \pi_{B_i}^n > \pi_{B_i}^*$ , and  $\Pi_i^{**} > \Pi_i^n > \Pi_i^*$ .

In market  $A$ , consumer surplus without data management is  $CS_A^n = v_A - t$ ; consumer surplus under data erasure is  $CS_A^* = v_A - \frac{5t^2 - \varepsilon^2}{4t}$ ; consumer surplus under data erasure and data portability is

$$\begin{aligned}CS_A^{**} &= \frac{1}{2} \left[ \int_0^{\frac{1}{2}} (v_A - tx - t(1 - 2x))dx + \int_{\frac{1}{2}}^{\bar{x}_1^{**}} (v_A - t(1 - x) - t(2x - 1))dx + \int_{\bar{x}_1^{**}}^1 (v_A - t(1 - x) - \alpha_2^{**})dx \right] \\ &\quad + \frac{1}{2} \left[ \int_0^{\bar{x}_2^{**}} (v_A - tx - \alpha_1^{**})dx + \int_{\bar{x}_2^{**}}^{\frac{1}{2}} (v_A - tx - t(1 - 2x))dx + \int_{\frac{1}{2}}^1 (v_A - t(1 - x) - t(2x - 1))dx \right] \\ &= v_A - \frac{11}{16}t.\end{aligned}$$

It is straightforward to check that  $CS_A^* < CS_A^n < CS_A^{**}$  holds.

In market  $B$ , consumer surplus without data management is  $CS_B^n = v_B - \frac{13}{16}t$ ; consumer surplus under data erasure is  $CS_B^* = v_B - \frac{12t^2 + 2t\varepsilon - \varepsilon^2}{16t}$ ; consumer surplus under data erasure and data portability is

$$CS_B^{**} = \int_0^{1/2} (v_B - tx - \beta_1^{**})dx + \int_{1/2}^1 (v_B - t(1 - x) - \beta_2^{**})dx = v_B - \frac{19}{16}t.$$

We can check that  $CS_B^* > CS_B^n > CS_B^{**}$  holds. Moreover,  $CS_A^n + CS_B^n > CS_A^{**} + CS_B^{**}$  always holds.

## 6 Proof of Proposition 6

■ **Benchmark: no data management** Our analysis begins with the observation that the indifferent consumer in market  $B$ ,  $\delta$ , is determined by (3), which is independent of the servicing cost  $c_B$ .

Suppose firm  $B_1$  acquires consumers from  $[0, \delta] \times [0, \bar{c}_B]$ , while firm  $B_2$  obtains consumers from  $[\delta, 1] \times [0, \bar{c}_B]$  in market  $B$ . In market  $A$ , firm  $A_1$ 's optimal personalized prices  $p_1(x, c_A)$  are determined by:  $v_A - tx - p_1(x, c_A) = v_A - t(1 - x) - \alpha_2$ , leading to  $p_1(x, c_A) = \alpha_2 + t(1 - 2x)$ . Similarly, firm  $A_2$ 's optimal personalized prices are defined by  $p_2(x, c_A) = \alpha_1 + t(2x - 1)$ . With these personalized prices, firm  $A_1$  can successfully poach firm  $A_2$ 's targeted consumers whose  $x$  lies in  $[0, \bar{x}_2]$ , where  $\bar{x}_2 = (t + c_A - \alpha_1)/(2t)$  and increases with  $c_A$  (see Figure 6). Firm  $A_2$  can poach firm  $A_1$ 's targeted consumers whose  $x$  lies in  $[\bar{x}_1, 1]$ , where  $\bar{x}_1 = (\alpha_2 + t - c_A)/(2t)$  and decreases with  $c_A$  (see Figure 6). Firm  $A_1$  selects  $\alpha_1$  to maximize its profit from the uniform price:  $\int_0^{\bar{c}_A} \int_0^{\bar{x}_2} (\alpha_1 - c_A) \frac{1-\delta}{\bar{c}_A} dx dc_A$ , where  $(1-\delta)/\bar{c}_A$  is the density function of firm  $A_2$ 's targeted consumers. Similarly, firm  $A_2$  selects  $\alpha_2$  to maximize its profit from the uniform price:  $\int_0^{\bar{c}_A} \int_{\bar{x}_1}^1 (\alpha_2 - c_A) \frac{\delta}{\bar{c}_A} dx dc_A$ . The equilibrium uniform prices and the cutoffs are

$$\alpha_1^n = \alpha_2^n = \frac{t + \bar{c}_A}{2}, \quad \bar{x}_1^n = \frac{3}{4} + \frac{\bar{c}_A - 2c_A}{4t}, \quad \bar{x}_2^n = \frac{1}{4} - \frac{\bar{c}_A - 2c_A}{4t}.$$

Both firms' optimal personalized prices,  $p_i^n(x, c_A)$ , can be calculated accordingly. Their profits from personalized prices are:

$$\int_0^{\bar{c}_A} \int_0^{\bar{x}_1^n} (p_1^n(x, c_A) - c_A) \frac{\delta}{\bar{c}_A} dx dc_A \quad \text{and} \quad \int_0^{\bar{c}_A} \int_{\bar{x}_2^n}^1 (p_2^n(x, c_A) - c_A) \frac{1-\delta}{\bar{c}_A} dx dc_A.$$

As a result, the equilibrium profits of firm  $A_1$  and firm  $A_2$  are

$$\pi_{A_1}^n = \frac{3(2 + 7\delta)t^2 + (3\delta - 2)(\bar{c}_A)^2}{48t}, \quad \pi_{A_2}^n = \frac{3(9 - 7\delta)t^2 + (1 - 3\delta)(\bar{c}_A)^2}{48t}. \quad (1)$$

Firm  $A_1$ 's profit increases with  $\bar{c}_A$  whenever  $\delta > 2/3$ , while firm  $A_2$ 's profit increases with  $\bar{c}_A$  whenever  $\delta < 1/3$ .

In market  $B$ , a consumer indexed by  $(y, c_B)$  receives the same expected utilities  $E[CS_{B_1}]$  and  $E[CS_{B_2}]$ . Consequently, the indifferent consumer is given by  $\delta = (\beta_2 - \beta_1 + t)/(2t)$ . The profits of

firms in market  $B$  are

$$\pi_{B_1}^n = \int_0^{\bar{c}_B} \int_0^\delta (\beta_1 - c_B) \frac{1}{\bar{c}_B} dy dc_B = (\beta_1 - \frac{\bar{c}_B}{2})\delta, \quad \pi_{B_2}^n = \int_0^{\bar{c}_B} \int_\delta^1 (\beta_2 - c_B) \frac{1}{\bar{c}_B} dy dc_B = (\beta_2 - \frac{\bar{c}_B}{2})(1 - \delta).$$

The equilibrium prices in market  $B$  are  $\beta_1^n = \beta_2^n = (9t^2 + 8t\bar{c}_B - (\bar{c}_A)^2)/(16t)$ , resulting in  $\delta^n = 1/2$ .

Note that as  $\bar{c}_A$  increases, the equilibrium price  $\beta_i^n$  decreases. Firm  $B_i$ 's equilibrium profits are  $\pi_{B_1}^n = \pi_{B_2}^n = (9t^2 - (\bar{c}_A)^2)/(32t)$ .

■ **Under data management** Suppose firm  $B_1$  obtains consumers from  $[0, \delta] \times [0, \bar{c}_B]$  and firm  $B_2$  obtains consumers from  $[\delta, 1] \times [0, \bar{c}_B]$  in market  $B$ . In market  $A$ , the consumers who choose to erase data are identical to those in Lemma 1, indicating that firm  $A_i$ 's opt-out consumers are independent of their servicing costs  $c_A$ . Each firm in market  $A$  selects its uniform price to maximize the profits from poached consumers and opt-out consumers. Specifically, firm  $A_1$  selects  $\alpha_1$  to maximize its profit from the uniform price:

$$\int_0^{\bar{c}_A} \int_0^{\bar{x}_2} (\alpha_1 - c_A) \frac{1 - \delta}{\bar{c}_A} dx dc_A + \int_0^{\bar{c}_A} \int_0^{\bar{x}_1} (\alpha_1 - c_A) \frac{\delta}{\bar{c}_A} dx dc_A.$$

Similarly, firm  $A_2$  selects  $\alpha_2$  to maximize its profit from the uniform price:

$$\int_0^{\bar{c}_A} \int_{\bar{x}_1}^1 (\alpha_2 - c_A) \frac{\delta}{\bar{c}_A} dx dc_A + \int_0^{\bar{c}_A} \int_{\bar{x}_2}^1 (\alpha_2 - c_A) \frac{1 - \delta}{\bar{c}_A} dx dc_A.$$

The equilibrium uniform prices in market  $A$  are

$$\alpha_1^* = \frac{t + \bar{c}_A}{2} + \delta(t - \varepsilon), \quad \alpha_2^* = \frac{t + \bar{c}_A}{2} + (1 - \delta)(t - \varepsilon).$$

Consequently, the equilibrium cutoffs are

$$\begin{aligned} \tilde{x}_1^* &= \frac{(1 - \delta)(t - \varepsilon)}{t}, & \tilde{x}_2^* &= 1 - \frac{\delta(t - \varepsilon)}{t}, \\ \bar{x}_1^*(c_A) &= \frac{3t + 2(1 - \delta)(t - \varepsilon) + \bar{c}_A - 2c}{4t}, & \bar{x}_2^*(c_A) &= \frac{t - 2\delta(t - \varepsilon) - \bar{c}_A + 2c}{4t}. \end{aligned}$$

Both firms' optimal personalized prices,  $p_i^*(x, c_A)$ , can be calculated accordingly. The profits from personalized prices for the two firms are

$$\int_0^{\bar{c}_A} \int_{\bar{x}_1^*}^{\bar{x}_1^*} (p_1^*(x, c_A) - c_A) \frac{\delta}{\bar{c}_A} dx dc_A \quad \text{and} \quad \int_0^{\bar{c}_A} \int_{\bar{x}_2^*}^{\bar{x}_2^*} (p_2^*(x, c_A) - c_A) \frac{1 - \delta}{\bar{c}_A} dx dc_A.$$

We can verify that firm  $A_1$ 's profit increases with  $\bar{c}_A$  whenever  $\delta > 2/3$ , while firm  $A_2$ 's profit increases with  $\bar{c}_A$  whenever  $\delta < 1/3$ .

In market  $B$ , each consumer can obtain the expected utilities  $E[CS_{B_1}]$  and  $E[CS_{B_2}]$  from market  $A$ , calculated in the same manner as in the baseline model. We find

$$E[CS_{B_1}] - E[CS_{B_2}] = \frac{(\delta - (1 - \delta))(t - \varepsilon)\varepsilon}{t} > 0 \text{ if and only if } \delta > 1 - \delta.$$

The indifferent consumer is  $\delta = \frac{1}{2} + \frac{t(\beta_2 - \beta_1)}{2(\varepsilon^2 - t\varepsilon + t^2)}$ , which is independent of  $c_B$ . The profits of firms in market  $B$  are

$$\pi_{B_1} = \int_0^{\bar{c}_B} \int_0^{\delta} (\beta_1 - c_B) \frac{1}{\bar{c}_B} dy dc_B = (\beta_1 - \frac{\bar{c}_B}{2})\delta, \quad \pi_{B_2} = \int_0^{\bar{c}_B} \int_{\delta}^1 (\beta_2 - c_B) \frac{1}{\bar{c}_B} dy dc_B = (\beta_2 - \frac{\bar{c}_B}{2})(1 - \delta).$$

The equilibrium prices in market  $B$  are

$$\beta_1^* = \beta_2^* = \frac{8t^2 + 15\varepsilon^2 - 14t\varepsilon - (\bar{c}_A)^2 + 8t\bar{c}_B}{16t},$$

implying  $\delta^* = 1/2$ . Note that as  $\bar{c}_A$  increases, the equilibrium price  $\beta_i^*$  decreases. Firm  $B_i$ 's equilibrium profits are  $\pi_{B_1}^* = \pi_{B_2}^* = (8t^2 + 15\varepsilon^2 - 14t\varepsilon - (\bar{c}_A)^2)/(32t)$ .

## 7 Proof for Proposition 7

Given consumers' expectation of prices in market  $A$ , a consumer of firm  $A_1$  chooses to opt in if and only if her location in market  $A$  is larger than  $\tilde{x}_1 = \frac{1}{2} + \frac{\alpha_2^a - \alpha_1^a}{2t} - \frac{b}{2t}$ . Conversely, a consumer of firm  $A_2$  opts in if and only if her location in market  $A$  is smaller than  $\tilde{x}_2 = \frac{1}{2} + \frac{\alpha_2^a - \alpha_1^a}{2t} + \frac{b}{2t}$ . Because consumers rationally anticipate equilibrium prices, inequality  $\tilde{x}_1 < \hat{x} < \tilde{x}_2$  should hold. Moreover, we can define  $\bar{x}_1 = \frac{1}{2} + \frac{\alpha_2}{2t}$  and  $\bar{x}_2 = \frac{1}{2} - \frac{\alpha_1}{2t}$ . After consumers' opt-in choices, the promised benefits paid to opt-in consumers become sunk. Firm  $A_1$  chooses  $\alpha_1$  to maximize  $\alpha_1 [(1 - \delta)\bar{x}_2 + \delta\tilde{x}_1]$  and firm  $A_2$  chooses  $\alpha_2$  to maximize  $\alpha_2 [\delta(1 - \bar{x}_1) + (1 - \delta)(1 - \tilde{x}_2)]$ . The subsequent analysis mirrors that of the baseline model. We find:

$$\alpha_1^* = \frac{t}{2} + \delta(t - b), \quad \alpha_2^* = \frac{t}{2} + (1 - \delta)(t - b), \quad \tilde{x}_1^* = \frac{(1 - \delta)(t - b)}{t}, \quad \tilde{x}_2^* = 1 - \frac{\delta(t - b)}{t}.$$

The equilibrium personalized prices are  $p_1^*(x) = \alpha_2^* + t(1 - 2x)$  and  $p_2^*(x) = \alpha_1^* + t(2x - 1)$ . It is important to note that the opt-in benefit  $b$  is already promised to all opting-in consumers, and

therefore does not influence the personalized prices.

In market  $B$ , a consumer's expected market- $A$  surplus if she purchases from firm  $B_i$  is:

$$E[CS_{B_1}] = \int_0^{\bar{x}_1^*} (v_A - \alpha_1^* - tx)dx + \int_{\bar{x}_1^*}^{\bar{x}_1^*} (v_A - p_1^*(x) - tx + b)dx + \int_{\bar{x}_1^*}^1 (v_A - \alpha_2^* - t(1-x) + b)dx,$$

$$E[CS_{B_2}] = \int_0^{\bar{x}_2^*} (v_A - \alpha_1^* - tx + b)dx + \int_{\bar{x}_2^*}^{\bar{x}_2^*} (v_A - p_2^*(x) - t(1-x) + b)dx + \int_{\bar{x}_2^*}^1 (v_A - \alpha_2^* - t(1-x))dx.$$

The indifferent consumer  $\delta$  is determined in the same manner as in equation (3), resulting in  $\delta = \frac{1}{2} + \frac{t(\beta_2 - \beta_1)}{2(b^2 - tb + t^2)}$ . The equilibrium uniform prices in market  $B$  are detailed in Section 5.4, which implies that  $\delta^* = 1/2$ .

Consumer surplus in the two market is

$$CS_A^* = v_A - \frac{5t^2 - b^2 - 4tb}{4t}, \quad CS_B^* = \int_0^{1/2} (v_B - ty - \beta_1^*)dy + \int_{1/2}^1 (v_B - t(1-y) - \beta_2^*)dy.$$

The comparison to the benchmark equilibrium in Section 4.2 under the condition  $b = \varepsilon$  is straightforward and will be omitted here.
